# Supplementary material for: The chemistry of 6-hydroxyflavylium: zwitterionic base and p-quinoidal chalcones. A multiswitchable system operated by proton, electron and photon inputs
Source: Royal Society of Chemistry journal article supplement (doi:10.1039/b615464f), 2007-02-13
Supplement: b615464f.pdf [file b615464f.pdf]

# The Chemistry of 6-Hydroxyflavylium: Zwitterionic base, and *p*-Quinoidal Chalcones. A Multiswitchable System Operated by Proton, Electron and Photon Inputs.

Antonio Jimenez, Carlos Pinheiro, A. Jorge Parola, Mauro Maestri, Fernando Pina

## Supplementary Material

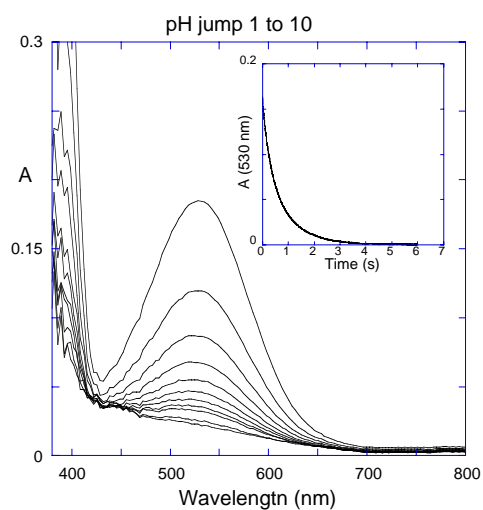

**Figure S1** - Kinetics of the zwitterionic base decay followed by stopped flow.

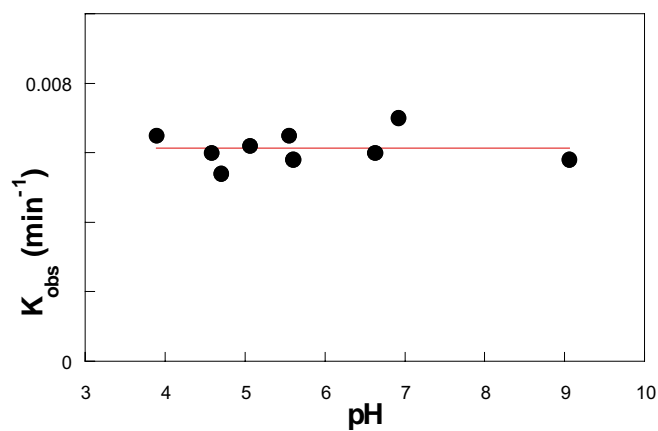

**Figure S2** - Rate constant of the *cis-trans* isomerization as a function of pH.

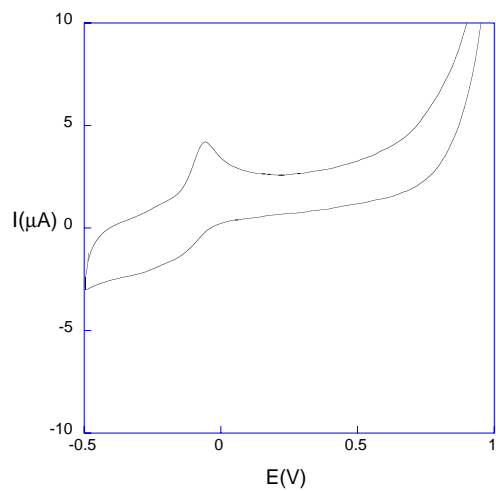

**Figure S3** – When a pH jump from 1 to 11.3 is carried out and a cyclic voltammetry is immediately performed, a new wave is formed that disappears after a few minutes.

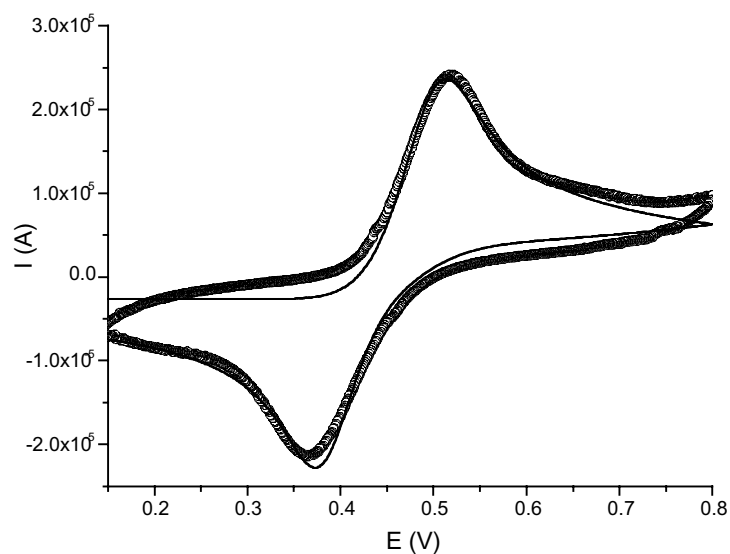

**Figure S4** - Comparison of experimental (circles) and fitted (line) cyclic voltammograms of  $2.9 \times 10^{-4}$  M 2,5-dihydroxychalcone at pH 1, run at  $0.1 \text{ Vs}^{-1}$ ;  $T=21 \text{ }^\circ\text{C}$ . The fitting was made using GPES4.9 commercial voltammetric simulation package from EcoChemie V.B. The working electrode was a GC electrode from BAS and the reference electrode was a Ag/AgCl electrode. Parameters extracted from the theoretical model: formal potential,  $E^0 = 0.438 \text{ V}$  (vs. Ag/AgCl); the electron transfer coefficient,  $\alpha = 0.48$ .
